CORRECTION

# Correction: The impact of vocabulary assessments on quality of life: Insights from professionals on their application with students with disabilities

Faisal Alqraini, Khalid Alasim, Abdulaziz Alqahtani

In the Acknowledgment section, the funding acquisition attributed to the author Faisal Alqraini should have been removed.

## Reference

1. Alqraini F, Alasim K, Alqahtani A. The impact of vocabulary assessments on quality of life: Insights from professionals on their application with students with disabilities. PLoS One. 2024;19(11):e0313690. <https://doi.org/10.1371/journal.pone.0313690> PMID: [39531458](https://pubmed.ncbi.nlm.nih.gov/39531458/)

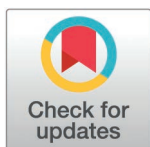

## OPEN ACCESS

**Citation:** Alqraini F, Alasim K, Alqahtani A (2025) Correction: The impact of vocabulary assessments on quality of life: Insights from professionals on their application with students with disabilities. PLoS One 20(8): e0330198. <https://doi.org/10.1371/journal.pone.0330198>

**Published:** August 11, 2025

**Copyright:** © 2025 Alqraini et al. This is an open access article distributed under the terms of the [Creative Commons Attribution License](https://creativecommons.org/licenses/by/4.0/), which permits unrestricted use, distribution, and reproduction in any medium, provided the original author and source are credited.
